# Supplementary material for: The apparent interferon resistance of transmitted HIV-1 is possibly a consequence of enhanced replicative fitness
Source: PubMed Central journal article supplement (PMC9718408; doi:10.1371/journal.ppat.1010973), 2022-11-18
Supplement: ppat.1010973.s001.pdf [file ppat.1010973.s001.pdf]

### Viability of IFN-treated TMZR5 cells

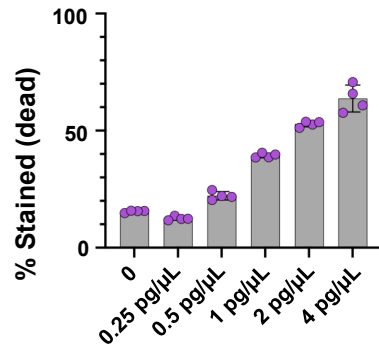

**S1.** Because of the proapoptotic effect of IFNs, the viability of IFN-treated TMZR5 cells was also assessed in parallel cultures to those used in Fig 1. Viability was tested using flow cytometry using the LIVE/DEAD fixable dead cell stain kit (Invitrogen)
