# Supplementary material for: The apparent interferon resistance of transmitted HIV-1 is possibly a consequence of enhanced replicative fitness
Source: PubMed Central journal article supplement (PMC9718408; doi:10.1371/journal.ppat.1010973), 2022-11-18
Supplement: ppat.1010973.s004.pdf [file ppat.1010973.s004.pdf]

S4. Sequencing coverage statistics

| Sample          | Start Position | End Pos | Number of reads | Coverage bases | Coverage | Mean Depth | Mean base q | Mean map q |
|-----------------|----------------|---------|-----------------|----------------|----------|------------|-------------|------------|
| CH040 TF        | 1              | 13088   | 520076          | 13088          | 100      | 5933.68    | 37.4        | 56.9       |
| CH040 CC        | 1              | 13088   | 552845          | 13088          | 100      | 6302.83    | 37.5        | 55.8       |
| CH058 TF        | 1              | 13124   | 589985          | 13124          | 100      | 6701       | 37.5        | 56.3       |
| CH058 CC        | 1              | 13124   | 530845          | 13124          | 100      | 6045.61    | 37.6        | 57.7       |
| CH077 TF        | 1              | 13163   | 496056          | 13163          | 100      | 5624.54    | 37.3        | 55.6       |
| CH236 TF        | 1              | 13785   | 573058          | 13785          | 100      | 6198.24    | 37.3        | 55.9       |
| CH236 CC        | 1              | 13785   | 492204          | 13785          | 100      | 5321.6     | 37.3        | 55.9       |
| CH470 TF        | 1              | 14187   | 673479          | 14187          | 100      | 7083.32    | 37.5        | 55.7       |
| CH850 TF        | 1              | 13703   | 653993          | 13703          | 100      | 7119.34    | 37.5        | 55.9       |
| CH850 CC        | 1              | 13706   | 699348          | 13706          | 100      | 7614.87    | 37.4        | 55.8       |
| CH058 TF<br>GIN | 1              | 14438   | 628697          | 14438          | 100      | 6481.14    | 37.5        | 56.5       |
| CH058 CC<br>GIN | 1              | 14438   | 506749          | 14438          | 100      | 5228.8     | 37.4        | 56         |
