# Supplementary material for: The apparent interferon resistance of transmitted HIV-1 is possibly a consequence of enhanced replicative fitness
Source: PubMed Central journal article supplement (PMC9718408; doi:10.1371/journal.ppat.1010973), 2022-11-18
Supplement: ppat.1010973.s005.pdf [file ppat.1010973.s005.pdf]

**S5.** Amino acid frequencies at sites that exhibit amino acid changes between sequenced TF/CC pairs are shown and compared to HxB2 (reference sequence)

| Gene                     | Gene Nucleotide Position | Codon Position | HXB2 Codon <sup>†</sup> | HXB2 AA <sup>†</sup> | AA position | HXB2 frequency <sup>†,‡</sup> | TF codon | TF AA | TF frequency <sup>‡</sup> | Chronic codon | Chronic AA | Chronic frequency <sup>‡</sup> | Mutation |
|--------------------------|--------------------------|----------------|-------------------------|----------------------|-------------|-------------------------------|----------|-------|---------------------------|---------------|------------|--------------------------------|----------|
| <b>CH040 (Subtype B)</b> |                          |                |                         |                      |             |                               |          |       |                           |               |            |                                |          |
| <i>gag</i>               | 359                      | 2              | gct                     | A                    | 120         | 0.966436                      | gct      | A     | 0.966436                  | gat           | D          | 0.001437                       | A120D    |
| <i>gag</i>               | 1208                     | 2              | aga                     | R                    | 403         | 0.444038                      | aga      | R     | 0.444038                  | aaa           | K          | 0.537678                       | R403K    |
| <i>pol</i>               | 227                      | 2              | aag                     | K                    | 76          | 0.941325                      | aag      | K     | 0.941325                  | agg           | R          | 0.04858                        | K76R     |
| <i>pol</i>               | 2178                     | 3              | gaa                     | E                    | 726         | 0.709989                      | gaa      | E     | 0.709989                  | gac           | D          | 0.279075                       | E726D    |
| <i>vif</i>               | 185                      | 2              | gct                     | A                    | 62          | 0.909312                      | gat      | D     | 0.03733                   | ggt           | G          | 0.023128                       | D62G     |
| <i>vif</i>               | 365                      | 2              | aag                     | K                    | 122         | 0.337797                      | aaa      | K     | 0.337797                  | aca           | T          | 0.000406                       | K122T    |
| <i>vif</i>               | 500                      | 2              | acg                     | T                    | 167         | 0.211199                      | aca      | T     | 0.211199                  | ata           | I          | 0.002029                       | T167I    |
| <i>vpr</i>               | 253                      | 1              | tcg                     | S                    | 85          | 0.002915                      | tca      | S     | 0.002915                  | aca           | T          | 0.000486                       | S85T     |
| <i>env</i>               | 440                      | 2              | atg                     | M                    | 147         | 0.008126                      | gaa      | E     | 0.011158                  | gga           | G          | 0.021831                       | E147G    |
| <i>env</i>               | 980                      | 2              | aga                     | R                    | 327         | 0.954639                      | aga      | R     | 0.954639                  | aaa           | K          | 0.026804                       | R327K    |
| <i>nef</i>               | 191                      | 2              | gag                     | E                    | 64          | 0.909185                      | ggg      | G     | 0.030618                  | gag           | E          | 0.909185                       | G64E     |
| <i>nef</i>               | 587                      | 2              | cga                     | R                    | 196         | 0.898529                      | cga      | R     | 0.898529                  | caa           | Q          | 0.025264                       | R196Q    |
| <b>CH058 (Subtype B)</b> |                          |                |                         |                      |             |                               |          |       |                           |               |            |                                |          |
| <i>gag</i>               | 743                      | 2              | gga                     | G                    | 248         | 0.628183                      | gga      | G     | 0.628183                  | gaa           | E          | 0.000653                       | G248E    |
| <i>env</i>               | 694                      | 1              | acg                     | T                    | 232         | 0.270588                      | act      | T     | 0.270588                  | gct           | A          | 0.003881                       | T232A    |
| <i>env</i>               | 1015                     | 1              | aat                     | N                    | 339         | 0.787993                      | aat      | N     | 0.787993                  | gat           | D          | 0.028987                       | N339D    |
| <i>env</i>               | 1764                     | 3              | aag                     | K                    | 588         | 0.466465                      | agg      | R     | 0.363736                  | agc           | S          | 0.001455                       | R588S    |
| <i>rev</i>               | 161                      | 2              | tcg                     | S                    | 54          | 0.490059                      | cgg      | R     | 0.006118                  | cag           | Q          | 0.089141                       | R54Q     |
| <i>env</i>               | 2239                     | 1              | cga                     | R                    | 747         | 0.504912                      | gga      | G     | 0.016859                  | aga           | R          | 0.504912                       | G747R    |
| <i>env</i>               | 2515                     | 1              | gct                     | A                    | 839         | 0.871801                      | gct      | A     | 0.871801                  | act           | T          | 0.0057                         | A839T    |
| <i>nef</i>               | 324                      | 3              | gat                     | D                    | 108         | 0.810885                      | gat      | D     | 0.810885                  | gag           | E          | 0.172324                       | D108E    |
| <b>CH236 (Subtype C)</b> |                          |                |                         |                      |             |                               |          |       |                           |               |            |                                |          |
| <i>gag</i>               | 366                      | 3              | aca                     | T                    | 122         | 0.002366                      | gat      | D     | 0.01656                   | gaa           | E          | 0.025684                       | D122E    |
| <i>pol</i>               | 46                       | 1              | ttt                     | F                    | 16          | 0.857282                      | ctt      | L     | 0.132976                  | ttt           | F          | 0.857282                       | L16F     |
| <i>pol</i>               | 1867                     | 1              | acc                     | T                    | 623         | 0.214321                      | tct      | S     | 0.56454                   | cct           | P          | 0.064296                       | S623P    |
| <i>pol</i>               | 1881                     | 3              | aca                     | T                    | 627         | 0.948855                      | acg      | T     | 0.948855                  | aca           | T          | 0.948855                       | T627T    |
| <i>vif</i>               | 110                      | 2              | gga                     | G                    | 37          | 0.84669                       | gga      | G     | 0.84669                   | gaa           | E          | 0.009872                       | G37E     |
| <i>vif</i>               | 274                      | 1              | aag                     | K                    | 92          | 0.232288                      | aga      | R     | 0.696283                  | gga           | G          | 0.055168                       | R92G     |
| <i>env</i>               | 481                      | 1              | atc                     | I                    | 161         | 0.220253                      | atg      | M     | 0.10725                   | gtg           | V          | 0.198159                       | M161V    |
| <i>env</i>               | 889                      | 1              | aca                     | T                    | 297         | 0.618182                      | aca      | T     | 0.618182                  | gca           | A          | 0.028308                       | T297A    |
| <i>env</i>               | 1499                     | 2              | aag                     | K                    | 500         | 0.351899                      | ggg      | G     | 0.126812                  | gag           | E          | 0.277791                       | G500E    |
| <i>env</i>               | 1520                     | 2              | cag                     | Q                    | 507         | 0.033142                      | ggg      | G     | 0.03061                   | gag           | E          | 0.824626                       | G507E    |
| <i>env</i>               | 1602                     | 3              | tca                     | S                    | 534         | 0.970771                      | tca      | S     | 0.970771                  | tcc           | S          | 0.970771                       | S534S    |
| <i>env</i>               | 1999                     | 1              | gca                     | A                    | 667         | 0.04603                       | gac      | D     | 0.038895                  | aac           | N          | 0.336939                       | D667N    |
| <i>rev</i>               | 286                      | 1              | ggg                     | G                    | 96          | 0.847545                      | ggg      | G     | 0.847545                  | agg           | R          | 0.105943                       | G96R     |
| <i>env</i>               | 2494                     | 1              | gta                     | V                    | 832         | 0.295052                      | gta      | V     | 0.295052                  | ata           | I          | 0.129344                       | V832I    |
| <i>nef</i>               | 314                      | 2              | aga                     | R                    | 105         | 0.122637                      | aaa      | K     | 0.679622                  | aga           | R          | 0.122637                       | K105R    |
| <i>nef</i>               | 324                      | 3              | gat                     | D                    | 108         | 0.537815                      | gaa      | E     | 0.44354                   | gac           | D          | 0.537815                       | E108D    |
| <i>nef</i>               | 512                      | 2              | cat                     | H                    | 171         | 0.923319                      | tat      | Y     | 0.005777                  | ttt           | F          | 0.001838                       | Y171F    |
| <i>nef</i>               | 568                      | 1              | gca                     | A                    | 190         | 0.951418                      | gca      | A     | 0.951418                  | aca           | T          | 0.003414                       | A190T    |
| <b>CH850 (Subtype C)</b> |                          |                |                         |                      |             |                               |          |       |                           |               |            |                                |          |
| <i>gag</i>               | 83                       | 2              | aaa                     | K                    | 28          | 0.078743                      | aaa      | K     | 0.078743                  | aca           | T          | 0.040554                       | K28T     |
| <i>gag</i>               | 1015                     | 1              | cca                     | P                    | 339         | 0.844204                      | cca      | P     | 0.844204                  | tca           | S          | 0.052045                       | P339S    |
| <i>gag</i>               | 1120                     | 1              | gct                     | A                    | 374         | 0.214262                      | tca      | S     | 0.096316                  | cca           | P          | 0.031092                       | S374P    |
| <i>vif</i>               | 305                      | 2              | cta                     | L                    | 102         | 0.969222                      | ctg      | L     | 0.969222                  | cag           | Q          | 0.000581                       | L102Q    |
| <i>env</i>               | 55                       | 1              | acc                     | T                    | 19          | 0.009436                      | ata      | I     | 0.825086                  | gta           | V          | 0.057077                       | I19V     |
| <i>vpu</i>               | 215                      | 2              | cac                     | H                    | 72          | 1                             | cat      | H     | 1                         | cgT           | R          | 0.000302                       | H72R     |
| <i>env</i>               | 646                      | 1              | cat                     | H                    | 216         | 0.982739                      | tat      | Y     | 0.011047                  | cat           | H          | 0.982739                       | Y216H    |
| <i>env</i>               | 1378                     | 1              | aat                     | N                    | 460         | 0.217261                      | aac      | N     | 0.217261                  | gga           | G          | 0.09298                        | N460G    |
| <i>env</i>               | 1379                     | 2              | aat                     | N                    | 460         | 0.217261                      | aac      | N     | 0.217261                  | gga           | G          | 0.09298                        | N460G    |
| <i>env</i>               | 1380                     | 3              | aat                     | N                    | 460         | 0.217261                      | aac      | N     | 0.217261                  | gga           | G          | 0.09298                        | N460G    |
| <i>env</i>               | 2446                     | 1              | aat                     | N                    | 816         | 0.044649                      | gat      | D     | 0.930035                  | aat           | N          | 0.044649                       | D816N    |
| <i>nef</i>               | 485                      | 2              | acc                     | T                    | 162         | 0.007878                      | gac      | D     | 0.001576                  | gcc           | A          | 0.001313                       | D162A    |

<sup>†</sup>HXB2 is a commonly used reference strain for consistent HIV-1 DNA and protein numbering.

<sup>‡</sup>The Los Alamos National Database (<http://www.hiv.lanl.gov/>) was used to download all gene sequences available ranging from 4568 sequences for tat to 19237 for nef in subtype B and from 1548 sequence in rev to 4345 in env for subtype C. Only one sequence was selected per patient. Following a codon alignment of each gene, the frequency of amino acids was determined for sites that are different between the paired TF and CC sequences for the relevant subtype.
