# Supplementary material for: The apparent interferon resistance of transmitted HIV-1 is possibly a consequence of enhanced replicative fitness
Source: PubMed Central journal article supplement (PMC9718408; doi:10.1371/journal.ppat.1010973), 2022-11-18

S6. Raw western blot images used in Fig 2

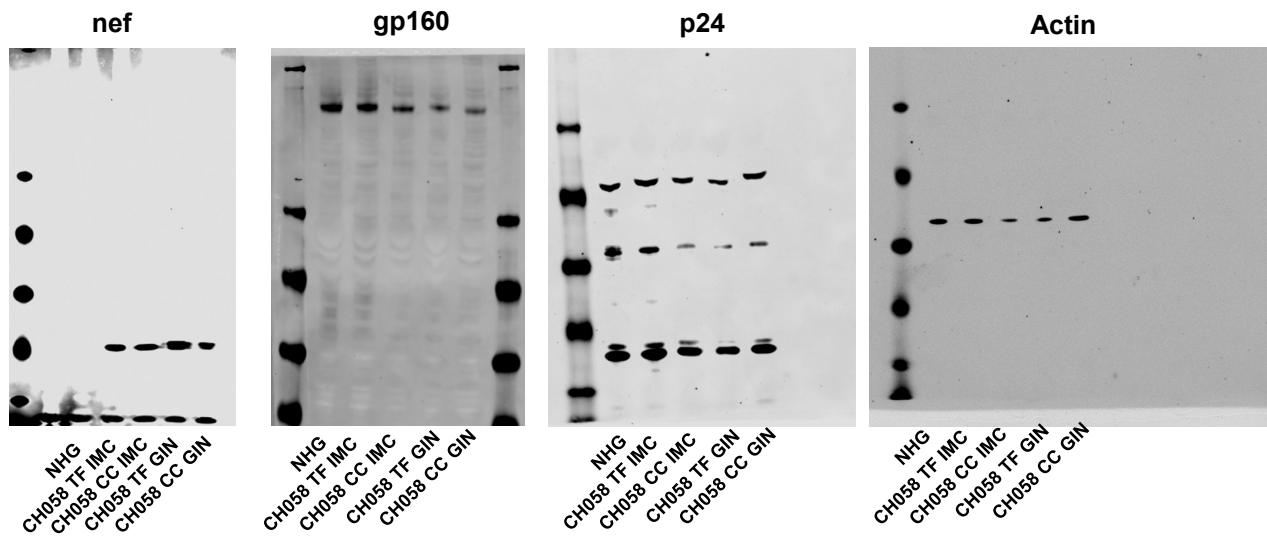

Supplement: ppat.1010973.s006.pdf [file ppat.1010973.s006.pdf]
