# Supplementary material for: The apparent interferon resistance of transmitted HIV-1 is possibly a consequence of enhanced replicative fitness
Source: PubMed Central journal article supplement (PMC9718408; doi:10.1371/journal.ppat.1010973), 2022-11-18

S7. Raw western blot files used in S2

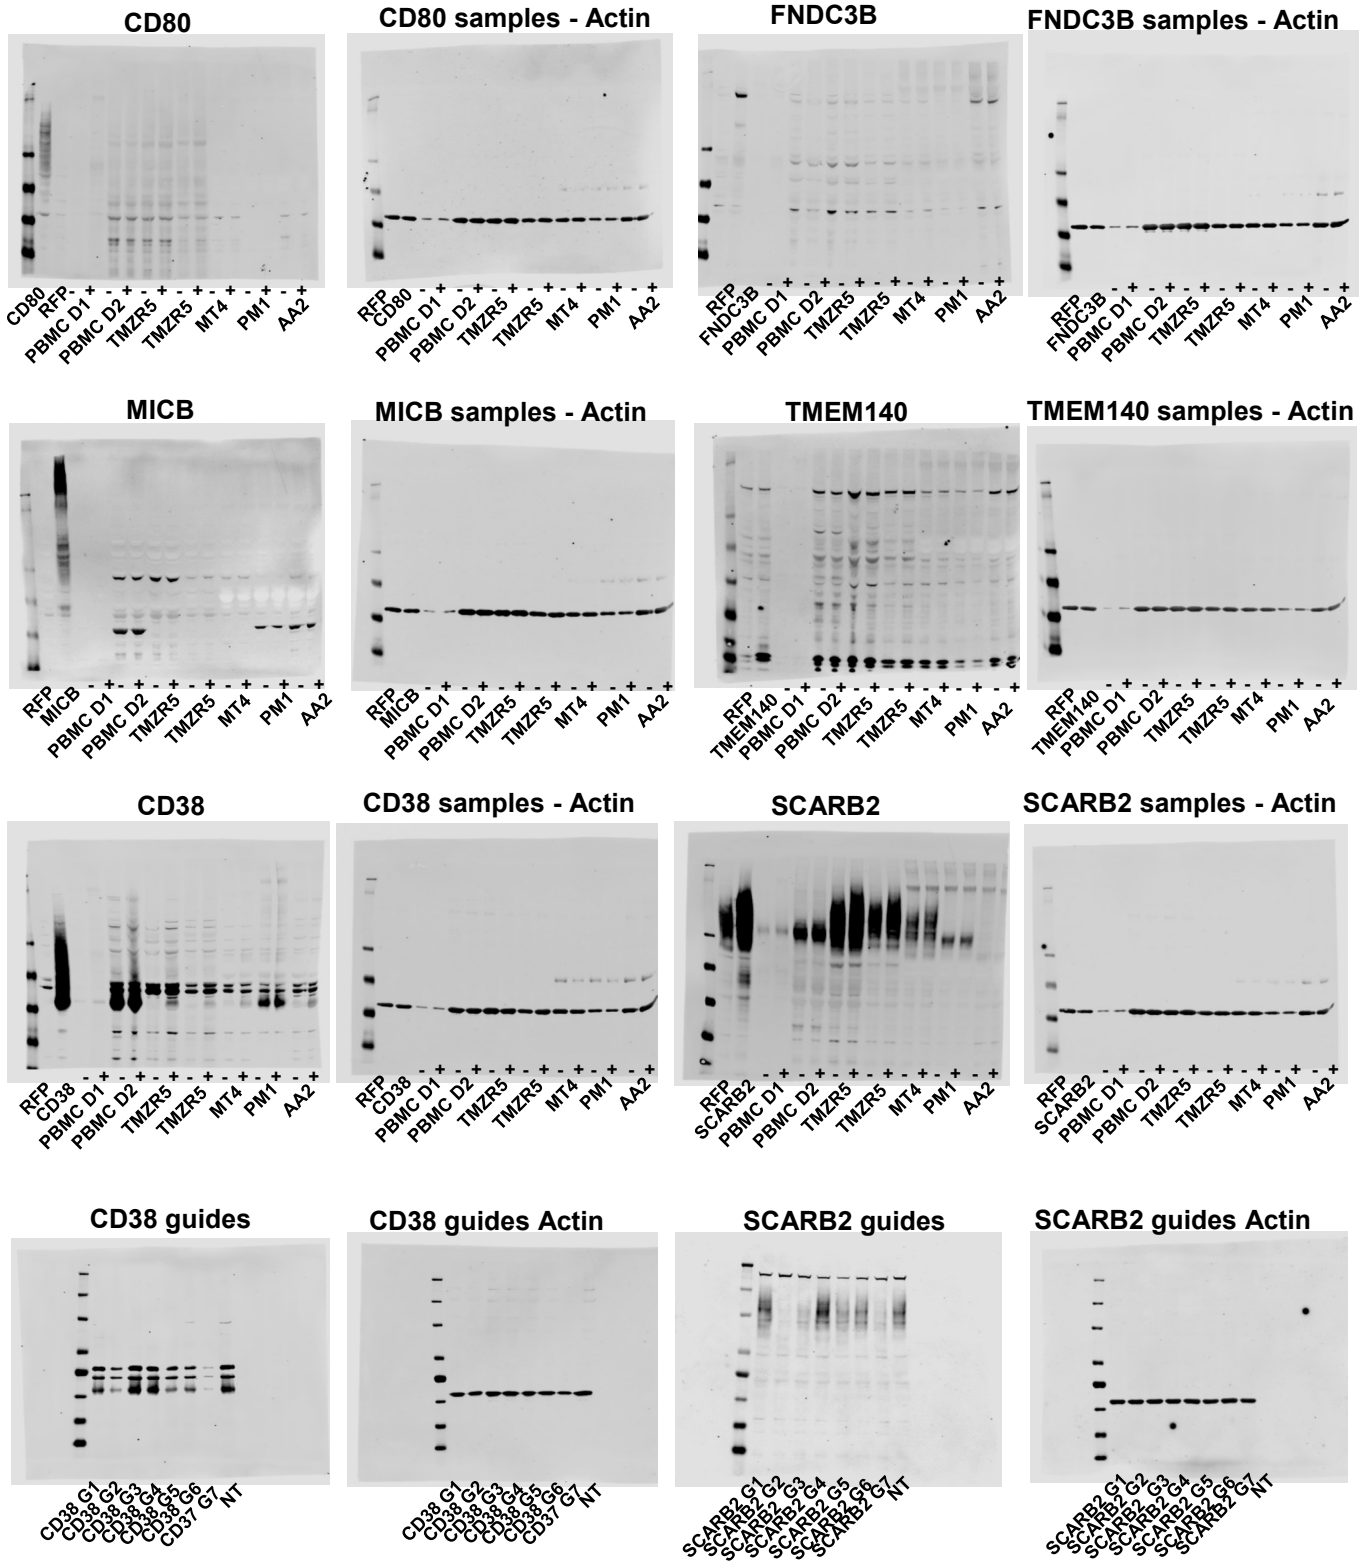

Supplement: ppat.1010973.s007.pdf [file ppat.1010973.s007.pdf]
